# Supplementary material for: Azasilicon-bridged heterocyclic arylamines: syntheses, structures and photophysical properties
Source: Royal Society of Chemistry journal article supplement (doi:10.1039/c7nj03876c), 2018-01-01
Supplement: c7nj03876c1.pdf [file c7nj03876c1.pdf]

Supporting Information  
for  
**Azasilicon-Bridged Heterocyclic Arylamines: Syntheses, structures and photophysical properties**

Shifang Yuan<sup>a,b,\*</sup>, Lijing Wang<sup>b</sup>, Chuanbing Huang<sup>c</sup>, Chunxia Niu<sup>b,c</sup>, Kai Xiang<sup>c</sup>, Caihong Xu<sup>c,\*</sup>,  
Gregory A. Solan<sup>c,d,\*</sup>, Hongwei Ma<sup>e,\*</sup> and Wen-Hua Sun<sup>c,\*</sup>

<sup>a</sup> Institute of Applied Chemistry, Shanxi University, Taiyuan 030006, People's Republic of China

<sup>b</sup> The School of Chemistry and Chemical Engineering, Shanxi University, Taiyuan 030006, PR China

<sup>c</sup> Institute of Chemistry, Chinese Academy of Sciences, Beijing 100190, People's Republic of China

<sup>d</sup> Department of Chemistry, University of Leicester, University Road, Leicester LE1 7RH, UK

<sup>e</sup> Analysis and Testing Centre, Beijing Institute of Technology, Beijing 102488, China.

1. Molecular structures of the bis-(N-aryl)-1,4-diphenylbutane-1,4-diimines: **E2**, **E3** and **E5**

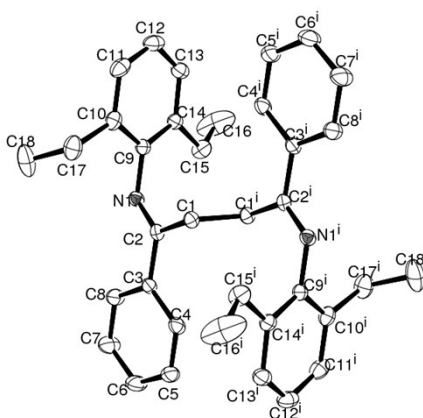

**Figure S1.** ORTEP representation of **E2** with the thermal ellipsoids shown at the 30% probability level; all hydrogen atoms are omitted for clarity.

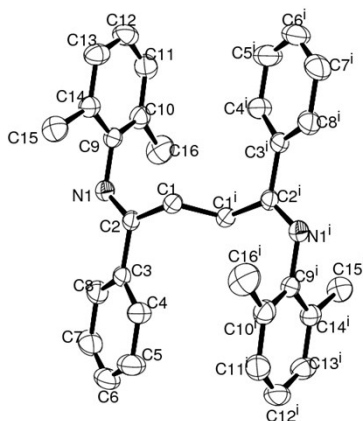

**Figure S2.** ORTEP representation of **E3** with the thermal ellipsoids shown at the 30% probability level; all hydrogen atoms are omitted for clarity.

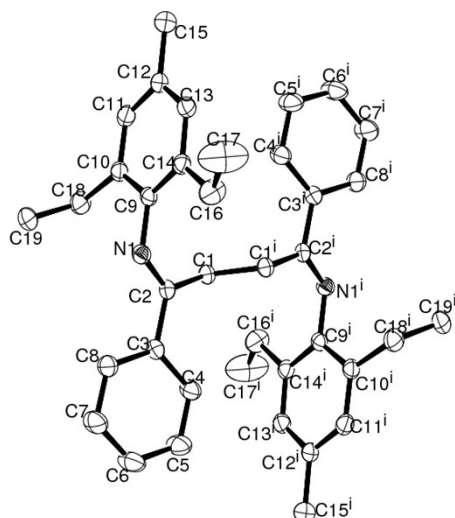

**Figure S3.** ORTEP representation of **E5** with the thermal ellipsoids shown at the 30% probability level; all hydrogen atoms are omitted for clarity.

2. Molecular structure of bis-(N-aryl)-1,4-diphenyl-2-butene-1,4-diimine **F3**

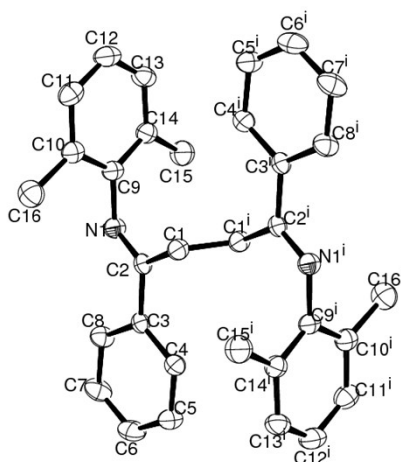

**Figure S4.** ORTEP representation of **F3** with the thermal ellipsoids shown at the 30% probability level; all hydrogen atoms are omitted for clarity.
